# Supplementary figures and images for: K-mer Content Changes with Node Degree in Promoter–Enhancer Network of Mouse ES Cells
Source: MDPI journal article supplement (doi:10.3390/ijms22158067), 2021-07-28

A

Sahlen promoters

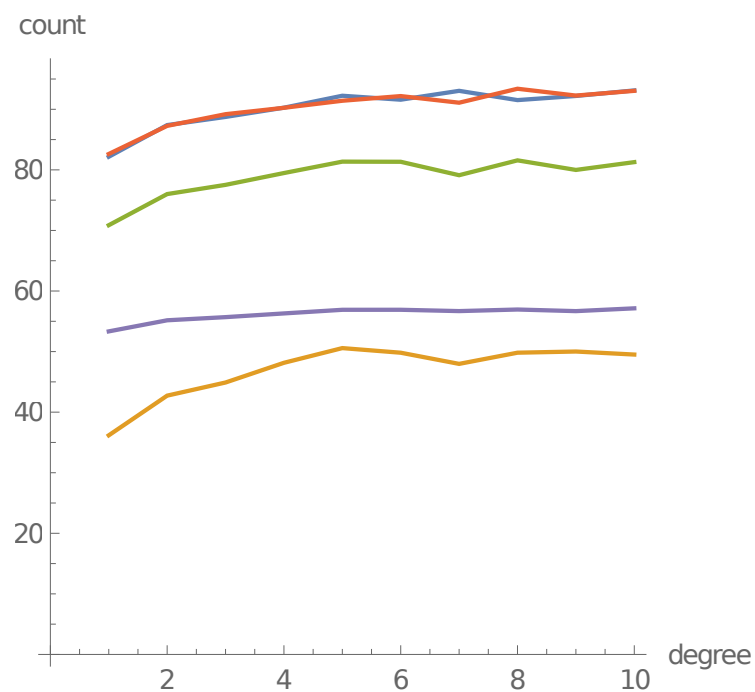

C

Rubin promoters

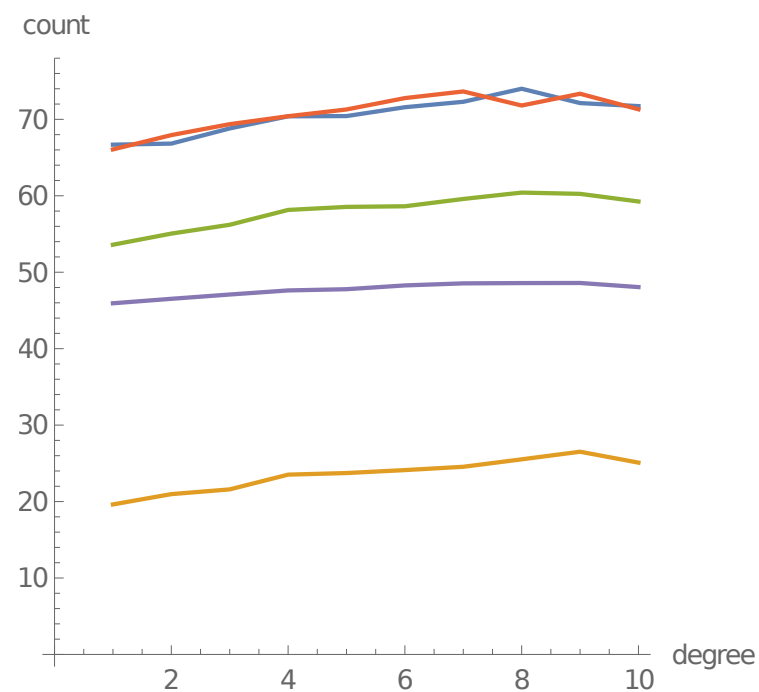

B

Sahlen enhancers

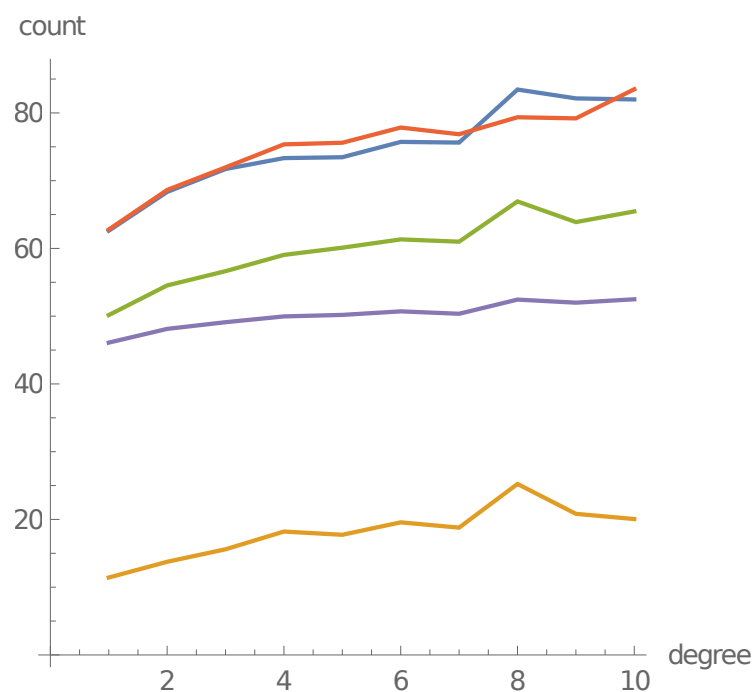

D

Rubin enhancers

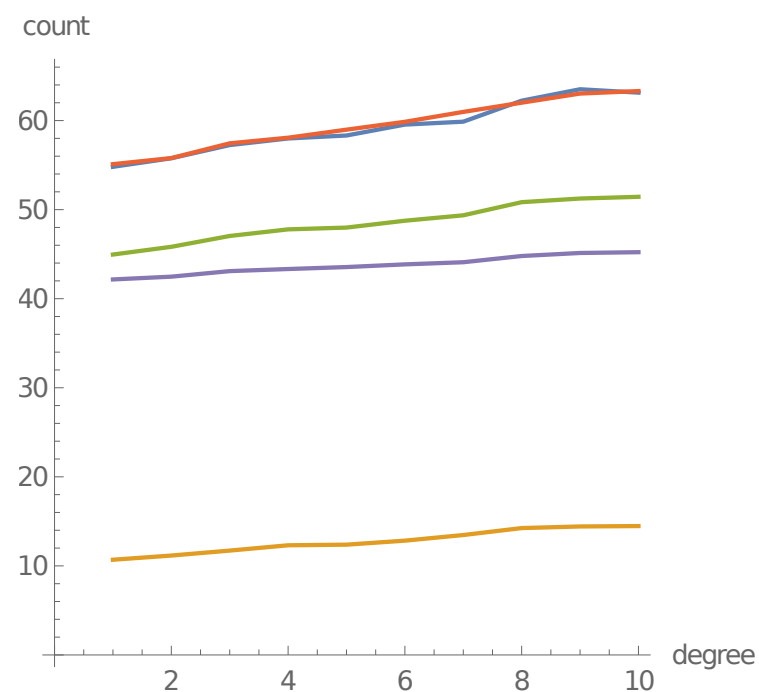

Figure S5

Supplement: s1 [file s1]

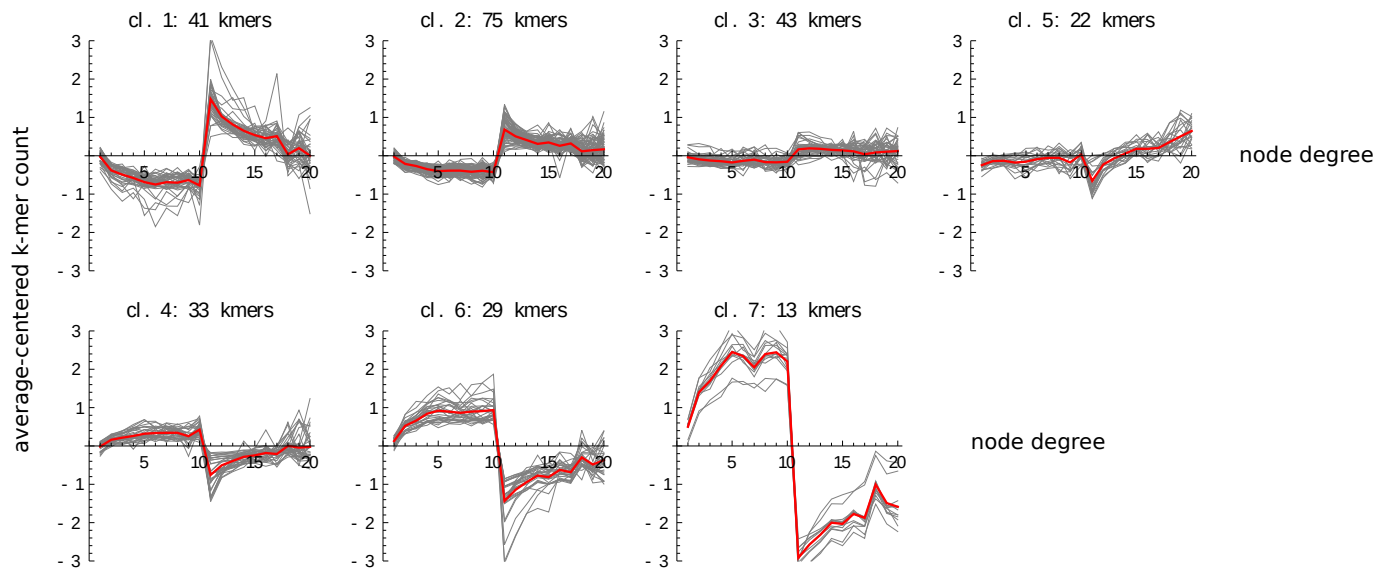

Figure S3

Supplement: s1 [file s1]

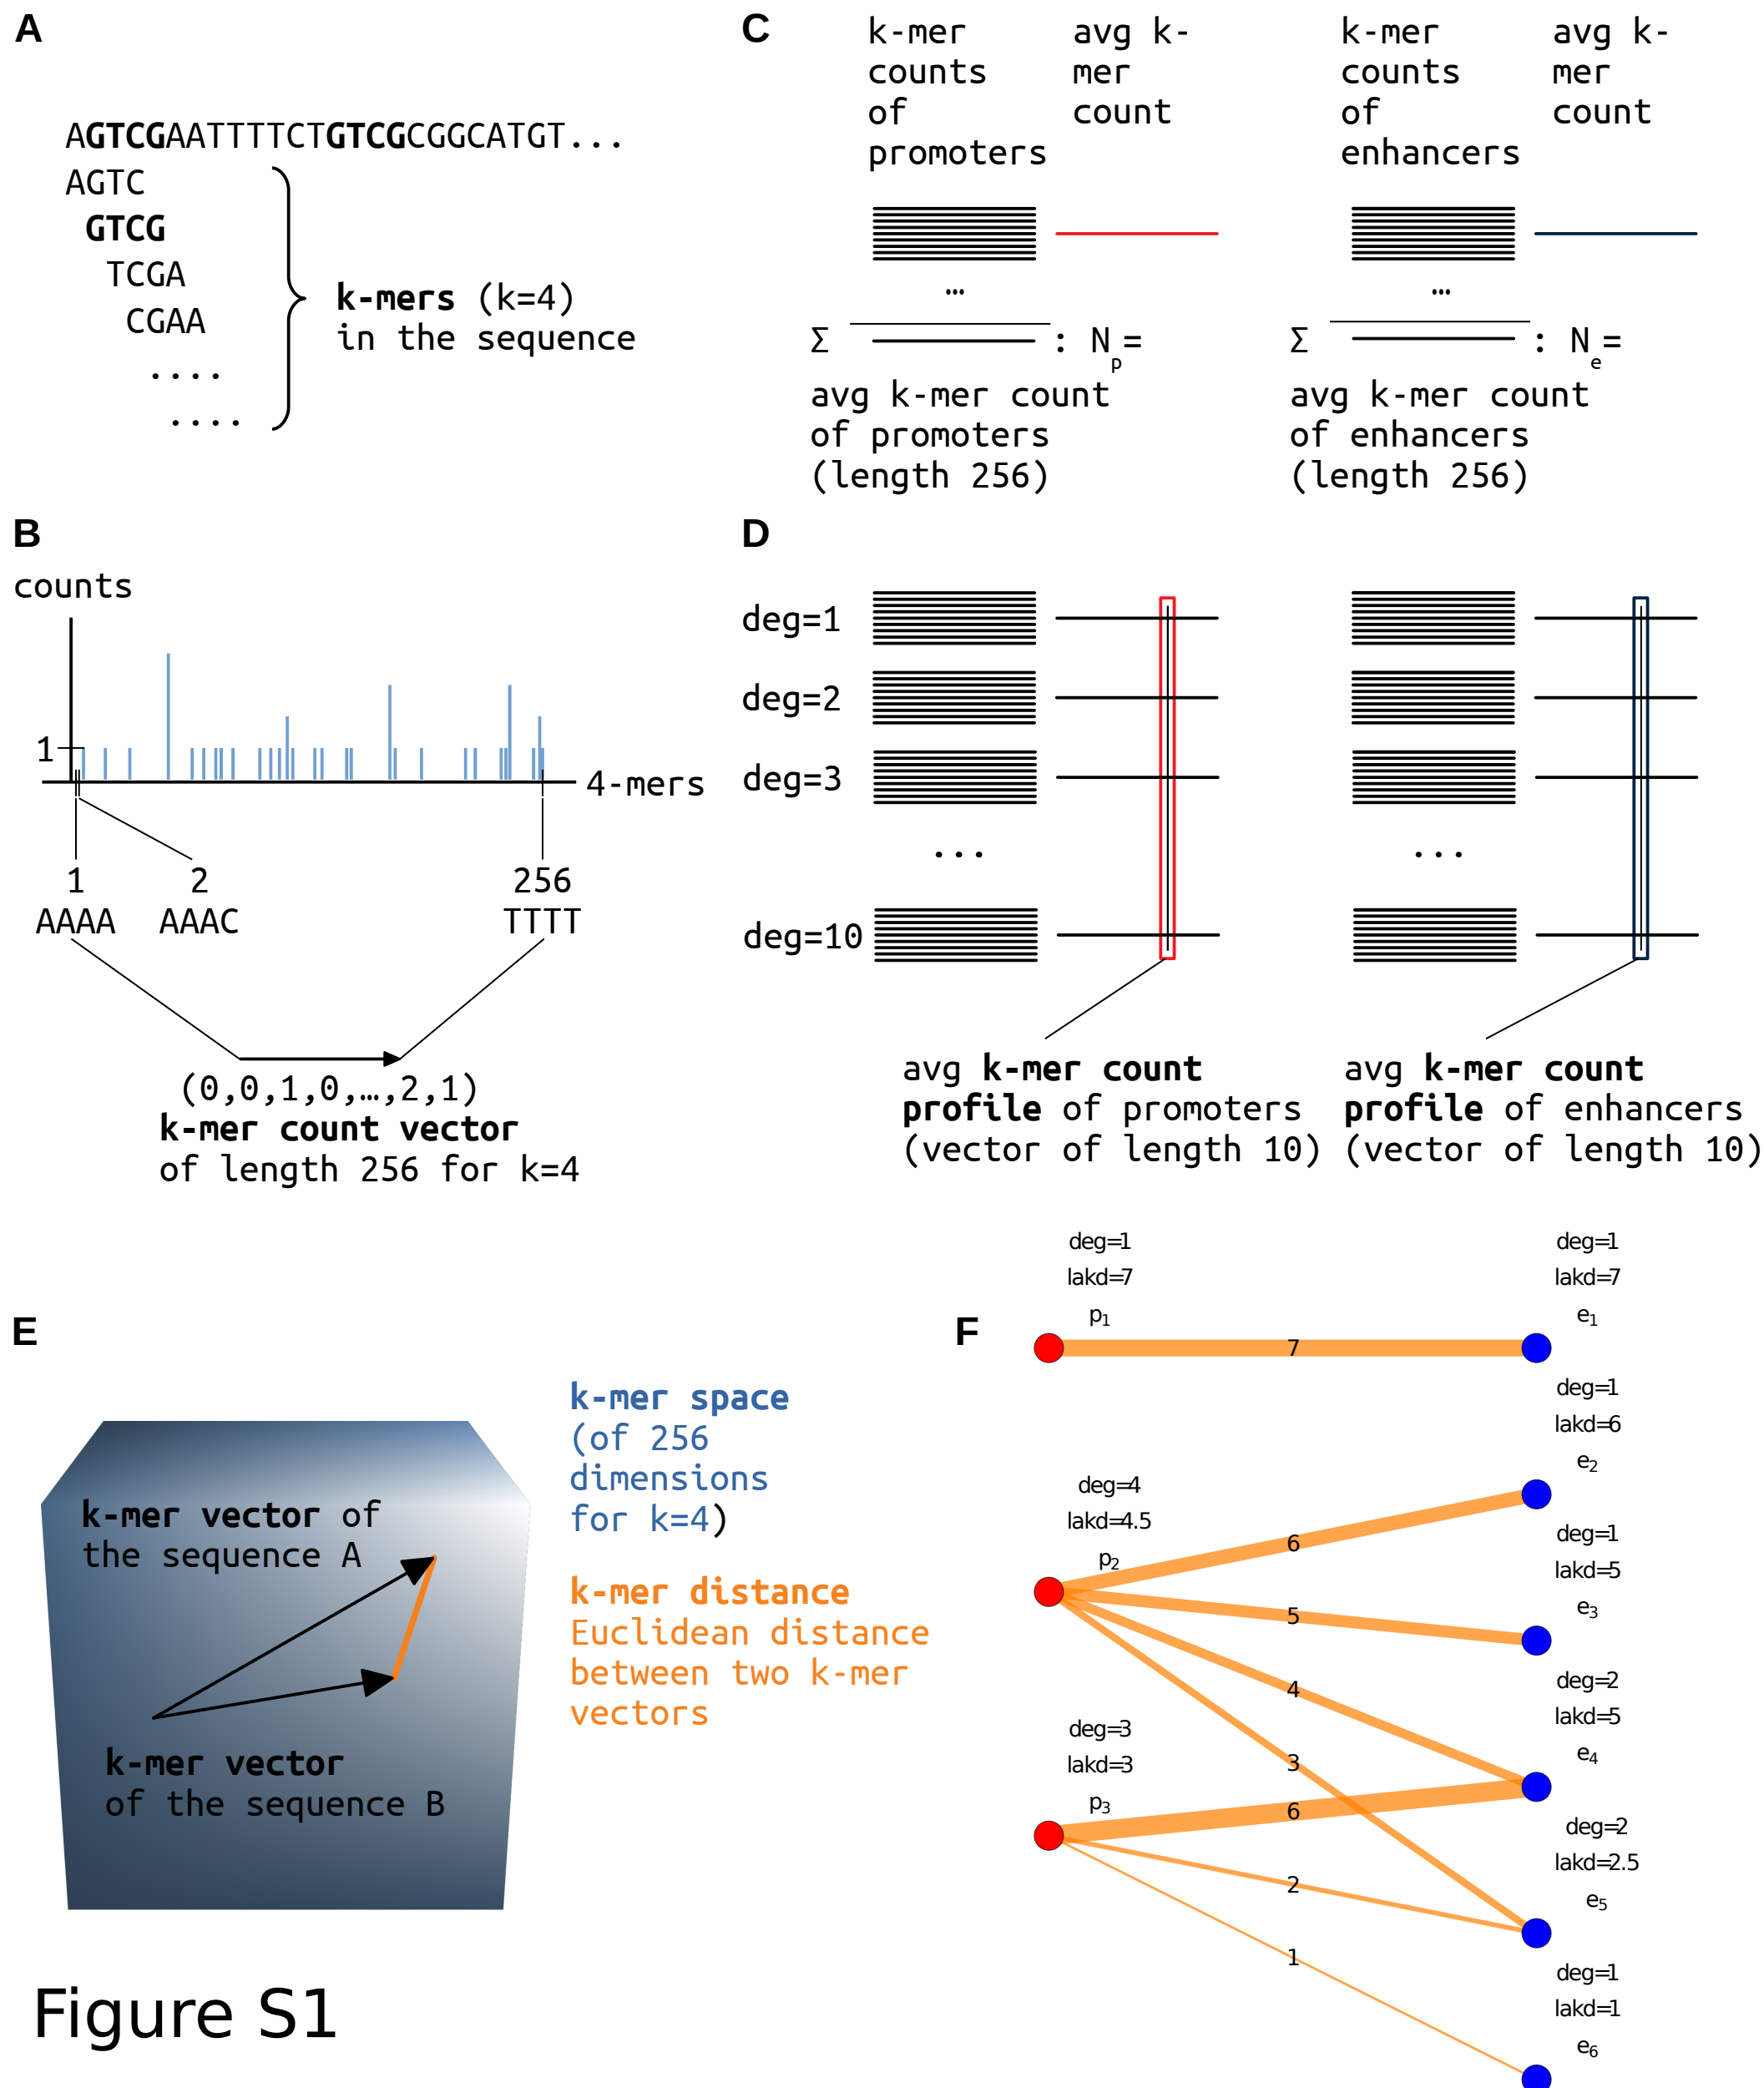

Figure S1

Supplement: s1 [file s1]

A

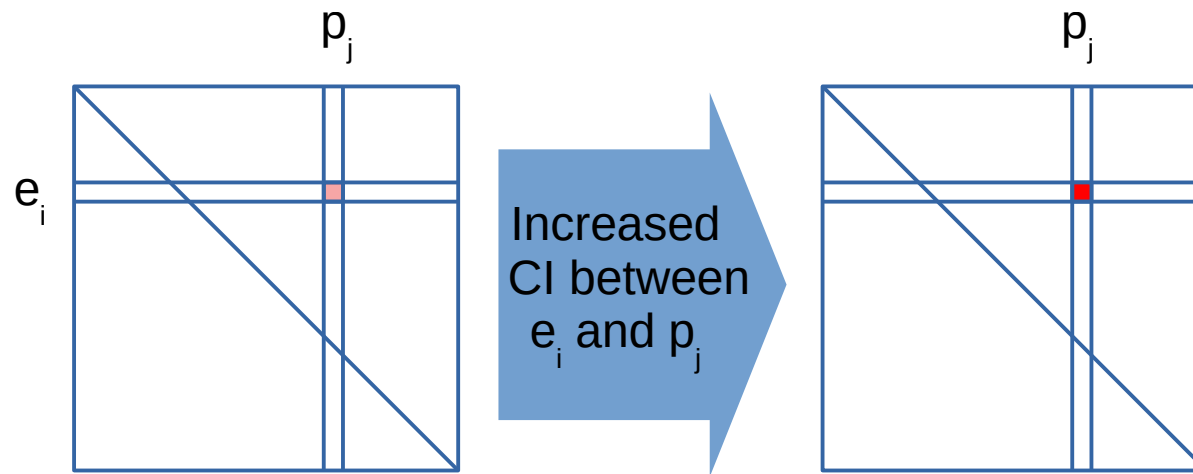

B

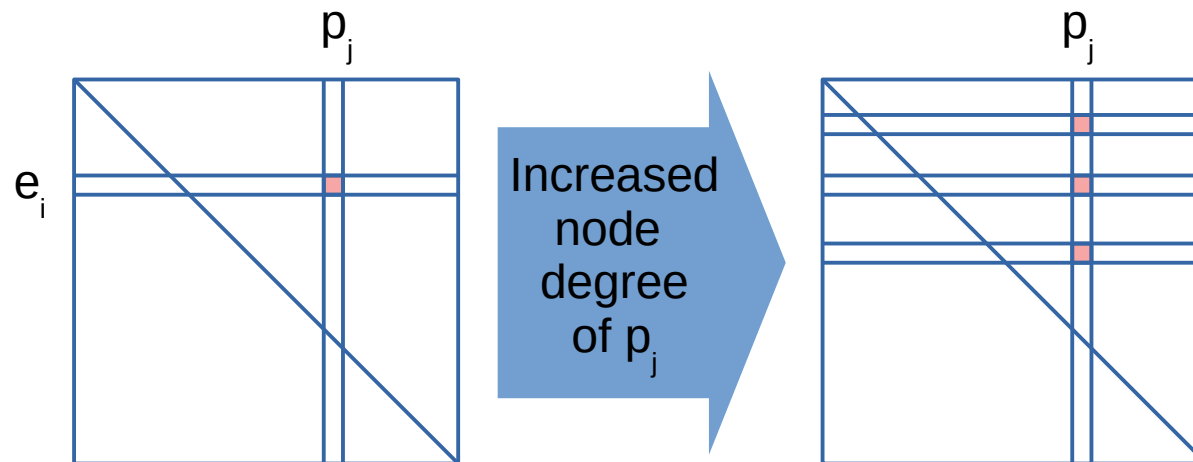

C

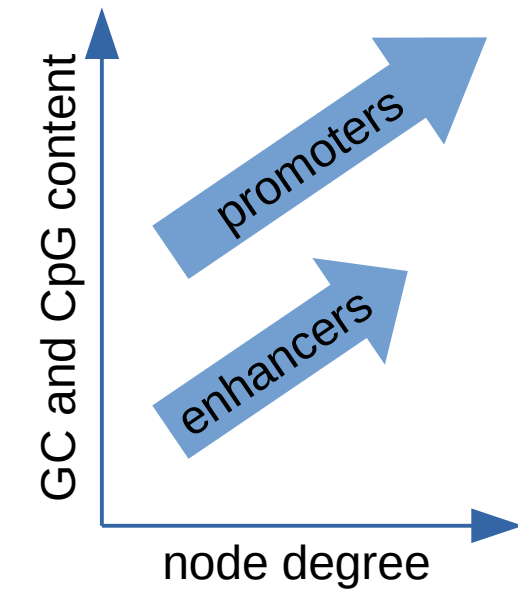

Figure S6

Supplement: s1 [file s1]

A

Sahlen promoters

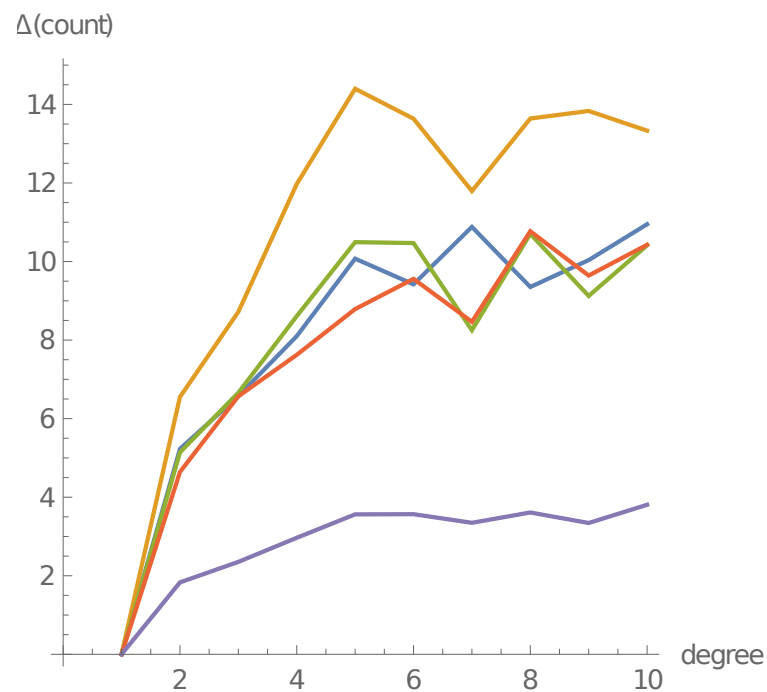

C

Rubin promoters

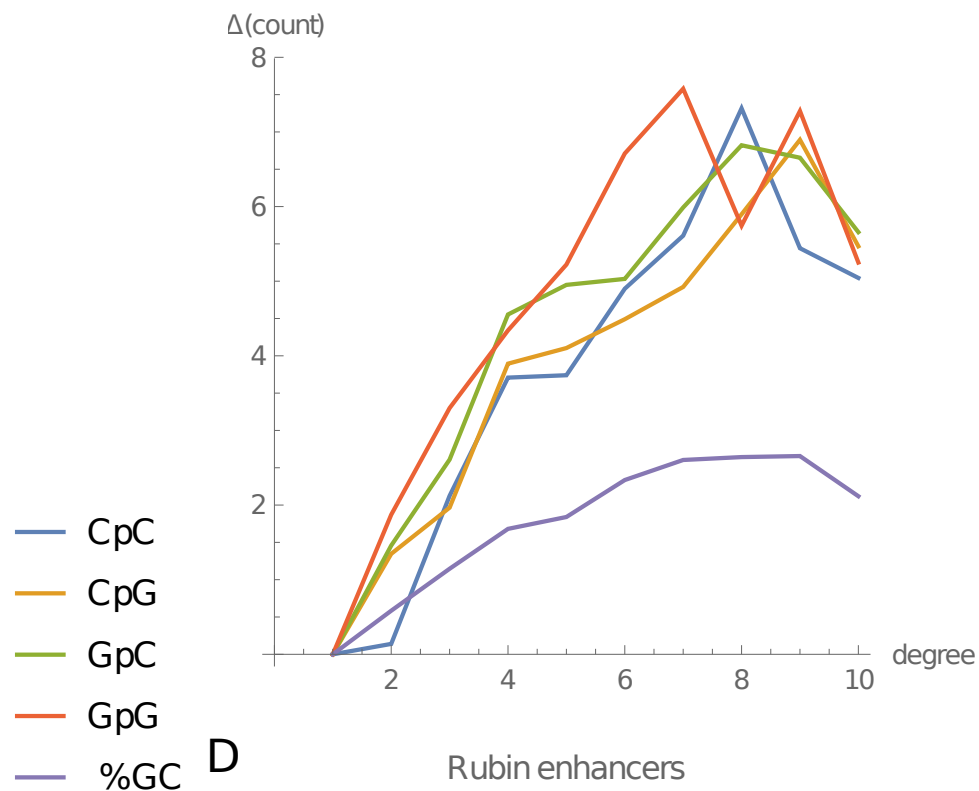

B

Sahlen enhancers

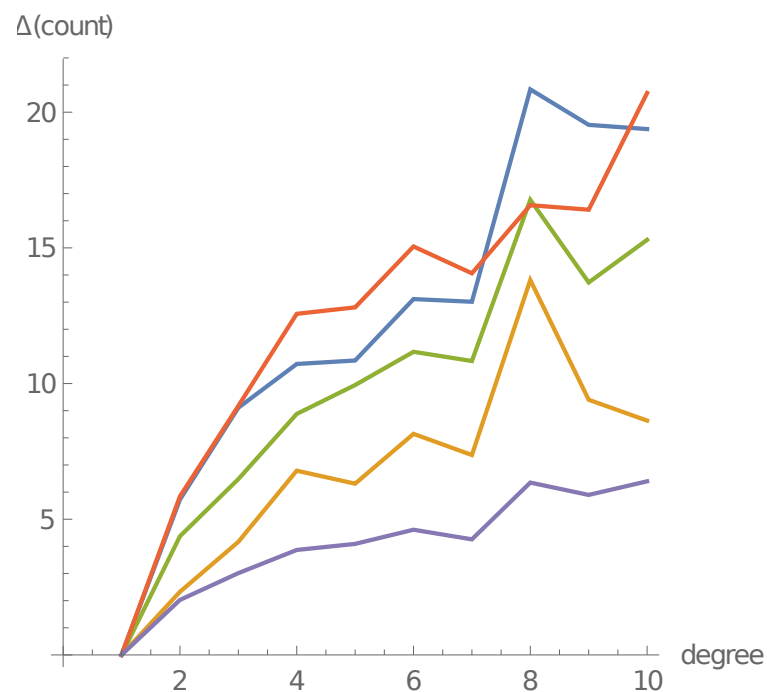

D

Rubin enhancers

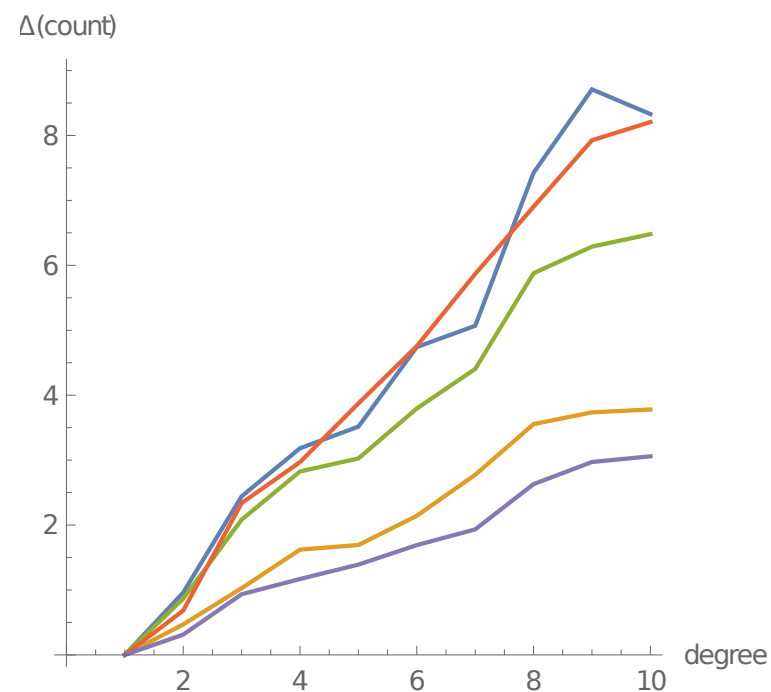

Figure S4

Supplement: s1 [file s1]
